# Supplementary material for: Microalgae as Sustainable Bio-Factories of Healthy Lipids: Evaluating Fatty Acid Content and Antioxidant Activity
Source: MDPI journal article supplement (doi:10.3390/md19070357), 2021-06-23
Supplement: s1 [file s1]

# Microalgae as sustainable bio-factories of healthy lipids: evaluating fatty acid content and antioxidant activity

Tiago A. Conde<sup>1,2,3†</sup>, Bruna F. Neves<sup>1,2†</sup>, Daniela Couto<sup>1,2</sup>, Tânia Melo<sup>1,2</sup>, Bruno Neves<sup>3</sup>, Margarida Costa<sup>4</sup>, Joana Silva<sup>4</sup>, Pedro Domingues<sup>1</sup> and M. Rosário Domingues<sup>1,2</sup>

<sup>1</sup>Mass Spectrometry Centre, LAQV-REQUIMTE, Department of Chemistry, University of Aveiro, Santiago University Campus, 3810-193 Aveiro, Portugal

<sup>2</sup>CESAM - Centre for Environmental and Marine Studies, Department of Chemistry, University of Aveiro, Santiago University Campus, 3810-193 Aveiro, Portugal

<sup>3</sup>Department of Medical Sciences and Institute of Biomedicine – iBiMED, University of Aveiro, 3810-193 Aveiro, Portugal

<sup>4</sup>Allmicroalgae Natural Products S.A., R&D Department, Rua 25 de Abril 19, 2445-287 Pataias, Portugal

<sup>†</sup>both authors contributed equally for the manuscript

Corresponding author: [mrd@ua.pt](mailto:mrd@ua.pt)

**Table S1.** Lipid content of *Chlorella vulgaris*, *Chlorococcum amblystomatis*, *Scenedesmus obliquus*, *Tetraselmis chui*, *Phaeodactylum tricornutum*, *Spirulina* sp. and *Nannochloropsis oceanica*. Kruskal–Wallis test followed by Dunn’s post-hoc comparisons).

| Microalgae               | <i>Chlorophyta</i>        |                                   |                             |                          | <i>Bacillariophyta</i>           | <i>Cyanobacteria</i>  | <i>Ochrophyta</i>               |
|--------------------------|---------------------------|-----------------------------------|-----------------------------|--------------------------|----------------------------------|-----------------------|---------------------------------|
|                          | <i>Chlorella vulgaris</i> | <i>Chlorococcum amblystomatis</i> | <i>Scenedesmus obliquus</i> | <i>Tetraselmis chui</i>  | <i>Phaeodactylum tricornutum</i> | <i>Spirulina</i> sp.  | <i>Nannochloropsis oceanica</i> |
| <b>Lipid content (%)</b> | 8.8±0.7 <sup>a,b</sup>    | 16.6±0.9 <sup>a,c</sup>           | 11.1±1.1                    | 6.5±0.4 <sup>c,d,e</sup> | 12.6±1.2 <sup>e</sup>            | 10.7±1.0 <sup>f</sup> | <b>20.9±3.4<sup>b,d,f</sup></b> |

**Table S2.** – Evaluation of the antioxidant activity for the extracts of different microalgae. Concentration of lipid extract ( $\mu\text{g.mL}^{-1}$ ) providing 50% inhibition of the ABTS<sup>•+</sup> radical and 20% inhibition of the DPPH<sup>•</sup> radical, and their respective Trolox equivalents (TE;  $\mu\text{mol.g}^{-1}$ ). The values are displayed as the mean (n = 3) ± standard deviation. Matching letters (a–f) indicate statistically significant differences between microalgae species, i.e. the same letter represents significant differences ( $q < 0.05$ , Kruskal–Wallis test followed by Dunn’s post-hoc comparisons).

|                          |                                | <i>Chlorophyta</i>         |                         |                         |                          | <i>Bacillariophyta</i> | <i>Cyanobacteria</i>  | <i>Ochrophyta</i>        |
|--------------------------|--------------------------------|----------------------------|-------------------------|-------------------------|--------------------------|------------------------|-----------------------|--------------------------|
|                          |                                | <i>C. vulgaris</i>         | <i>C. amblystomatis</i> | <i>S. obliquus</i>      | <i>T. chui</i>           | <i>P. tricornutum</i>  | <i>Spirulina</i> sp.  | <i>N. oceanica</i>       |
| <b>ABTS<sup>•+</sup></b> | IC50 ( $\mu\text{g.mL}^{-1}$ ) | 51.1 ±3.7                  | 52.6±4.6                | 29.4±1.2 <sup>b</sup>   | 40.9±4.7                 | 57.3±4.5 <sup>b</sup>  | 38.7±1.6 <sup>c</sup> | 101.9±1.7 <sup>a,c</sup> |
|                          | TE ( $\mu\text{mol.g}^{-1}$ )  | 368.4 ±27.0                | 358.8±32.4              | 637.5±27.4 <sup>a</sup> | 432.9±51.3               | 306.6±23.5             | 452.2±9.6             | 184.0±3.2 <sup>a</sup>   |
| <b>DPPH<sup>•</sup></b>  | IC20 ( $\mu\text{g.mL}^{-1}$ ) | 50.5 ±12.3 <sup>d,e</sup>  | 58.4±10.7 <sup>f</sup>  | 89.1±6.6                | 225.7±6.9 <sup>d,f</sup> | 75.4±4.6               | 96.9±9.7              | 175.6±8.7 <sup>e</sup>   |
|                          | TE ( $\mu\text{mol.g}^{-1}$ )  | 191.8 ±40.0 <sup>d,e</sup> | 143.0±25.1 <sup>f</sup> | 114.5±8.9               | 45.0±1.4 <sup>d,f</sup>  | 122.3±7.2              | 84.3±9.1              | 52.5±2.7 <sup>e</sup>    |

## A. Hierarchical clustering

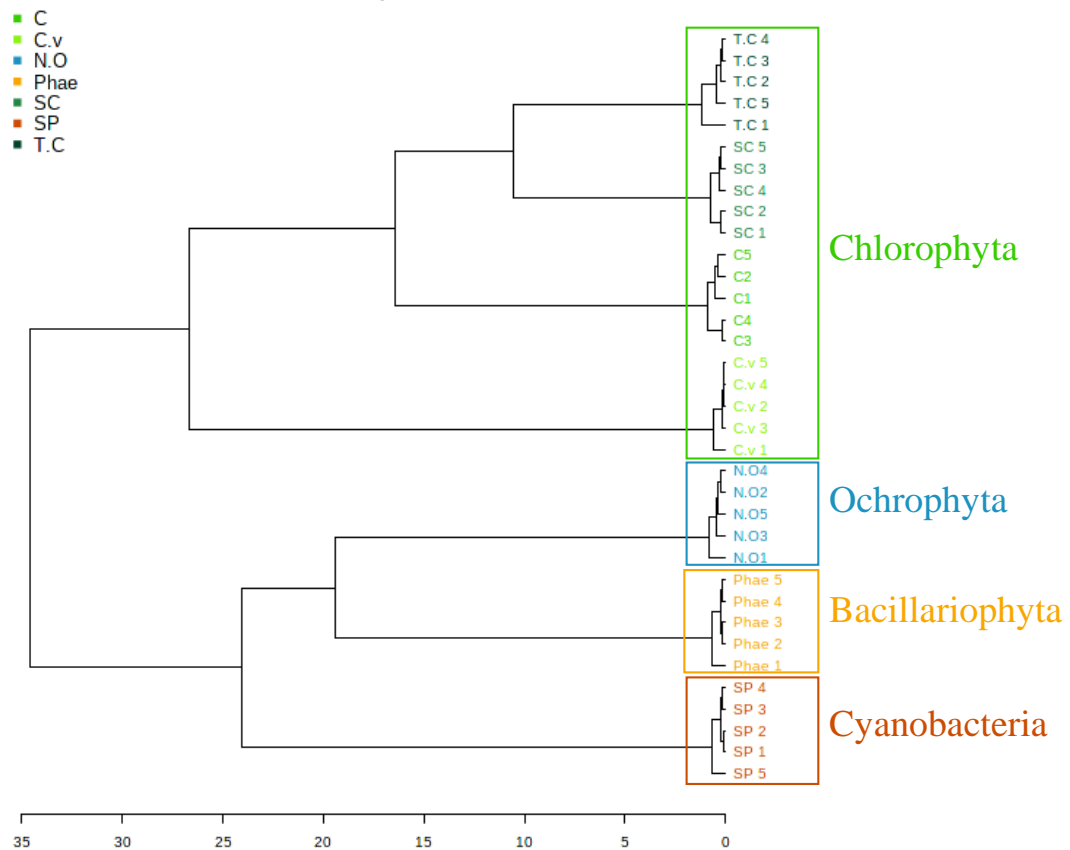

**Figure S1. (A)** Hierarchical cluster analysis using relative abundance after Glog normalization of all fatty acids identified in *Chlorella vulgaris*, *Chlorococcum amblystomatis*, *Scenedesmus obliquus*, *Tetraselmis chui*, *Phaeodactylum tricornutum*, *Spirulina* sp. and *Nannochloropsis oceanica*. The green, blue, yellow, and orange boxes show microalgae from the phylum Chlorophyta, Ochrophyta, Bacillariophyta and Cyanobacteria, respectively. Abbreviations: C, *Chlorococcum amblystomatis*; C.v, *Chlorella vulgaris*; SC, *Scenedesmus obliquus*; T.C, *Tetraselmis chui*; Phae, *Phaeodactylum tricornutum*; SP, *Spirulina* sp.; and N.O, *Nannochloropsis oceanica*.

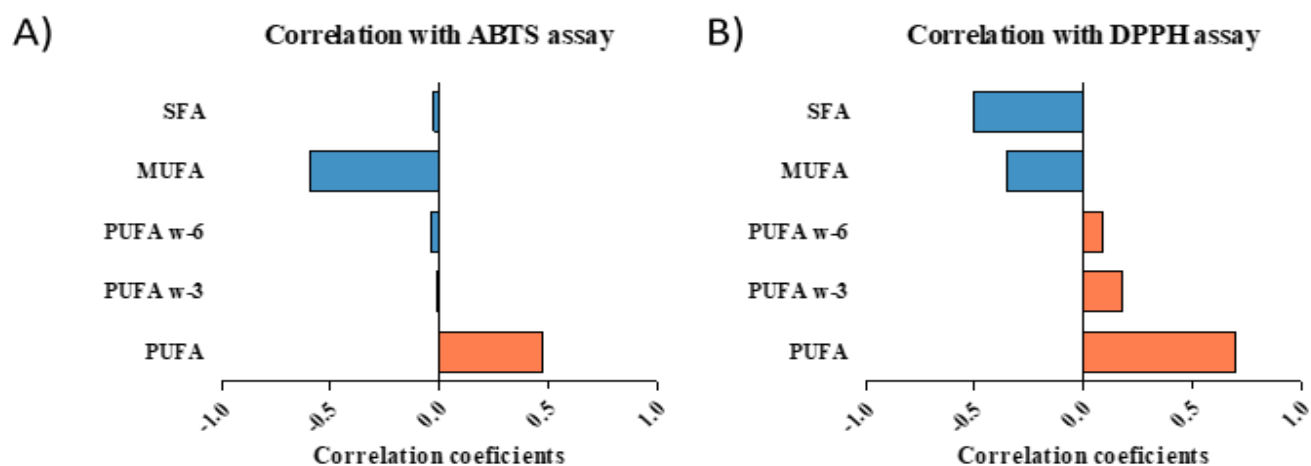

**Figure S2.** Correlation coefficients analysis using the sum of relative abundances from saturated fatty acids (SFA), mono-unsaturated FA (MUFA), polyunsaturated FA (PUFA), omega-3 PUFA and omega-6 PUFA, and antioxidant activity. **(A)** Correlation coefficients with ABTS assay. **(B)** Correlation coefficients with DPPH assay.
